# Supplementary material
Source: PubMed Central journal article supplement (PMC6095130)
Supplement: NIHMS945898-supplement-Supplement1.pdf [file NIHMS945898-supplement-Supplement1.pdf]

## Supplemental Information

### Characterization of end-of-pipe controls in support of the manuscript “Marginal abatement cost curve for NO<sub>x</sub> that incorporates control measures, renewable electricity, energy efficiency and fuel switching”

Dan Loughlin

End-of-pipe NO<sub>x</sub> controls were added to the database to represent the maximum reduction options for industrial, residential, commercial and off-highway sources. The control characterizations were derived from the file All\_Poll\_All\_Sectors\_US\_DetStratRslt\_NOX\_Cntrls.xlsx, which was created by OAQPS’ David Misenheimer as part of the Ozone NAAQS RIA process. Using pivot tables and a state-to-MARKAL region crosswalk, the average percent reduction and cost-per-ton-of-pollutant-treated for controls within each MARKAL region and SCC<sup>1</sup> aggregation level were calculated, one through four.

Next, a crosswalk that links MARKAL’s emission control technologies to the most relevant control characterizations was constructed. The crosswalk is provided in **Table 1**. The resulting control efficiencies and cost-per-ton-of-emissions-treated for each MARKAL category are shown in **Tables 2 and 3**, respectively.

Although All\_Poll\_All\_Sectors\_US\_DetStratRslt\_NOX\_Cntrls.xlsx lists controls that would make up a “maximum control strategy,” there are many sources within the inventory that are not represented in the file. Some of these sources do not have any controls available. For others, OAQPS assumes that controls cannot be implemented cost-effectively because the source is too small. To prevent MARKAL from placing controls on these sources, All\_Poll\_All\_Sectors\_US\_DetStratRslt\_NOX\_Cntrls.xlsx was compared with a 2025 inventory and the fraction of regional NO<sub>x</sub> emissions at each SCC tier that is controllable was estimated.

Inventory data were obtained from the file 2025\_NOx\_state\_scc\_summary.xlsx, which summarized state-level emissions by SCC for the 2025 modeling inventory used in the Ozone NAAQS RIA. This file was obtained from OAQPS’ Alison Eyth on 4/18/14. Using a pivot table, we aggregated these by region and SCC tier. Comparing the emissions in each tier provided an estimate of the percentage of the emissions in that category that are subject to control. Where there was no data for a particular category-region combination, it was assumed that 20% of the emissions were subject to control. This percentage was a typical low value for categories for which data could be calculated. The percentages were mapped to MARKAL controls, and the result is shown in **Table 4**.

For questions regarding this study, please contact Dan Loughlin at [loughlin.dan@epa.gov](mailto:loughlin.dan@epa.gov).

---

<sup>1</sup> There are approximately 10,000 source classification codes, or SCCs, within the EPA emission inventory. The codes are organized in a hierarchy which is defined as tiers or levels. Typically four levels are used, providing more specific information with each level.

**Table 1. Crosswalk between MARKAL control categories and SCC-level control characterizations.**

| MARKAL control applied to: |                    | Matching SCC category       |                                        |                               |                        |
|----------------------------|--------------------|-----------------------------|----------------------------------------|-------------------------------|------------------------|
| Fuel                       | From               | Tier 1                      | Tier 2                                 | Tier 3                        | Tier 4                 |
| coal                       | boilers            | External combustion boilers | Industrial                             | Bituminous/Subbituminous coal | [all]                  |
| coal                       | turbines           | Internal combustion engines | Industrial                             | Natural gas                   | [all turbines]         |
| coal                       | process heaters    | Industrial processes        | In-Process Fuel Use                    | Bituminous/Subbituminous coal | [all]                  |
| coal                       | other              | Stationary fuel combustion  | Industrial                             | Bituminous/Subbituminous coal | [all]                  |
| gas                        | boilers            | External combustion boilers | Industrial                             | Natural gas                   | [all]                  |
| gas                        | engines            | Internal combustion engines | Industrial                             | Natural gas                   | [all engines]          |
| gas                        | turbines           | Internal combustion engines | Industrial                             | Natural gas                   | [all turbines]         |
| gas                        | process heaters    | Industrial processes        | Petroleum Industry                     | Process Heaters               | [all with gas in name] |
| gas                        | other              | Stationary fuel combustion  | Industrial                             | Distillate oil                | [all]                  |
| distillate                 | boilers            | External combustion boilers | Industrial                             | Distillate oil                | [all]                  |
| distillate                 | engines            | Internal combustion engines | Industrial                             | Distillate oil                | [all engines]          |
| distillate                 | turbines           | Internal combustion engines | Industrial                             | Natural gas                   | [all turbines]         |
| distillate                 | process heaters    | Industrial processes        | Miscellaneous manufacturing industries | Distillate (No 2)             | Process heaters        |
| distillate                 | other              | Stationary fuel combustion  | Industrial                             | Distillate oil                | [all]                  |
| fuel oil                   | boilers            | External combustion boilers | Industrial                             | Residual oil                  | [all]                  |
| fuel oil                   | engines            | Internal combustion engines | Industrial                             | Residual/crude oil            | [all]                  |
| fuel oil                   | Petroleum industry | Industrial processes        | Process heaters                        | Oil-fired                     | [all]                  |
| fuel oil                   | other              | Stationary fuel combustion  | Industrial                             | Distillate oil                | [all]                  |
| other                      | boilers            | External combustion boilers | Industrial                             | Distillate oil                | [all]                  |
| other                      | engines            | Internal combustion engines | Industrial                             | Distillate oil                | [all engines]          |
| other                      | turbines           | Internal combustion engines | Industrial                             | Natural gas                   | [all turbines]         |
| other                      | process heaters    | Industrial processes        | Miscellaneous manufacturing industries | Distillate (No 2)             | Process heaters        |
| other                      | other              | Stationary fuel combustion  | Industrial                             | [all]                         | [all]                  |
| diesel                     | off-highway diesel | Off-highway vehicle diesel  | Mobile sources                         | [all]                         | [all]                  |
| various                    | residential        | Stationary fuel combustion  | Residential                            | [all]                         | [all]                  |
| various                    | commercial         | [all matching]              | Commercial/Institutional               | [all]                         | [all]                  |
| various                    | refineries         | Industrial processes        | Petroleum Industry                     | [all]                         | [all]                  |
| various                    | facility heat      | External combustion boilers | Space Heaters                          | [all]                         | [all]                  |
| various                    | Coking             | Industrial processes        | Primary Metal Production               | By-Product Coke Manufacturing | [all]                  |





**Table 4. Rule penetration estimates, derived from comparing information about the set of maximum controls and the 2025 modeling inventory.**

| MARKAL control category |                    | Regional Rule Penetration, % |      |      |      |      |      |      |      |      |
|-------------------------|--------------------|------------------------------|------|------|------|------|------|------|------|------|
| Fuel                    | Type               | 1                            | 2    | 3    | 4    | 5    | 6    | 7    | 8    | 9    |
| coal                    | boilers            | 100%                         | 93%  | 51%  | 60%  | 96%  | 96%  | 95%  | 79%  | 100% |
| coal                    | turbines           | 20%                          | 20%  | 20%  | 20%  | 20%  | 20%  | 20%  | 20%  | 20%  |
| coal                    | process heaters    | 20%                          | 20%  | 20%  | 20%  | 20%  | 20%  | 20%  | 20%  | 20%  |
| coal                    | other              | 20%                          | 20%  | 20%  | 20%  | 20%  | 20%  | 20%  | 20%  | 20%  |
| gas                     | boilers            | 23%                          | 30%  | 25%  | 23%  | 44%  | 40%  | 66%  | 20%  | 48%  |
| gas                     | engines            | 51%                          | 33%  | 80%  | 85%  | 85%  | 84%  | 56%  | 41%  | 51%  |
| gas                     | turbines           | 100%                         | 100% | 100% | 100% | 100% | 100% | 100% | 100% | 100% |
| gas                     | process heaters    | 20%                          | 20%  | 20%  | 20%  | 20%  | 20%  | 26%  | 20%  | 20%  |
| gas                     | other              | 20%                          | 20%  | 20%  | 20%  | 20%  | 20%  | 20%  | 20%  | 20%  |
| distillate              | boilers            | 20%                          | 20%  | 20%  | 20%  | 20%  | 20%  | 48%  | 20%  | 20%  |
| distillate              | engines            | 61%                          | 33%  | 22%  | 21%  | 28%  | 44%  | 10%  | 17%  | 54%  |
| distillate              | turbines           | 100%                         | 100% | 100% | 100% | 100% | 100% | 100% | 100% | 100% |
| distillate              | process heaters    | 20%                          | 20%  | 20%  | 20%  | 20%  | 20%  | 20%  | 100% | 20%  |
| distillate              | other              | 12%                          | 18%  | 8%   | 2%   | 2%   | 2%   | 2%   | 14%  | 63%  |
| fuel oil                | boilers            | 12%                          | 12%  | 12%  | 12%  | 12%  | 12%  | 12%  | 12%  | 12%  |
| fuel oil                | engines            | 20%                          | 20%  | 20%  | 20%  | 20%  | 20%  | 20%  | 20%  | 100% |
| fuel oil                | turbines           | 20%                          | 20%  | 20%  | 20%  | 20%  | 20%  | 20%  | 20%  | 20%  |
| fuel oil                | process heaters    | 20%                          | 20%  | 20%  | 20%  | 20%  | 20%  | 20%  | 20%  | 20%  |
| fuel oil                | other              | 20%                          | 20%  | 20%  | 20%  | 20%  | 20%  | 20%  | 20%  | 20%  |
| other                   | boilers            | 20%                          | 20%  | 20%  | 20%  | 20%  | 20%  | 20%  | 20%  | 20%  |
| other                   | engines            | 20%                          | 20%  | 20%  | 20%  | 20%  | 20%  | 20%  | 20%  | 20%  |
| other                   | turbines           | 20%                          | 20%  | 20%  | 20%  | 20%  | 20%  | 20%  | 20%  | 20%  |
| other                   | process heaters    | 20%                          | 20%  | 20%  | 20%  | 20%  | 20%  | 20%  | 20%  | 20%  |
| other                   | other              | 21%                          | 46%  | 60%  | 48%  | 51%  | 51%  | 77%  | 61%  | 73%  |
| diesel                  | Off-highway diesel | 66%                          | 67%  | 75%  | 93%  | 75%  | 79%  | 82%  | 82%  | 72%  |
| miscl                   | Residential        | 78%                          | 81%  | 67%  | 46%  | 51%  | 38%  | 61%  | 61%  | 72%  |
| miscl                   | Commercial         | 20%                          | 43%  | 55%  | 43%  | 56%  | 48%  | 66%  | 60%  | 61%  |
| miscl                   | Refineries         | 20%                          | 52%  | 32%  | 7%   | 20%  | 28%  | 28%  | 2%   | 22%  |
| miscl                   | Facility heat      | 20%                          | 20%  | 20%  | 0%   | 25%  | 20%  | 20%  | 14%  | 0%   |
| miscl                   | Coking             | 20%                          | 94%  | 7%   | 20%  | 55%  | 99%  | 20%  | 20%  | 20%  |
